# Supplementary material for: Human Health Risk Assessment Is Associated with the Consumption of Metal-Contaminated Groundwater around the Marituba Landfill, Amazonia, Brazil
Source: MDPI journal article supplement (doi:10.3390/ijerph192113865), 2022-10-25
Supplement: s1 [file s1]

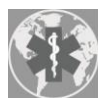

**Table S1.** Geographical location and depth of groundwater wells around the landfill site, Amazonia, Brazil.

| Point | Geographical Coordinates |               | Source of Supply | Depth | Neighbourhood |
|-------|--------------------------|---------------|------------------|-------|---------------|
| P01   | 01°23'49.4"              | 048°20'49.8"  | Artesian well    | 17    | São João      |
| P02   | 01°23'50.9"              | 048°20'45.6"  | Artesian well    | 18    | São João      |
| P03   | 01°23'50.0"              | 048°20'48.8"  | Amazon well      | 15    | São João      |
| P04   | 01°23'47.8"              | 048°20'45.0"  | Amazon well      | 6     | São João      |
| P05   | 01°23'41.5"              | 048°20'49.2"  | Amazon well      | 12    | São João      |
| P06   | 01°23'39.1"              | 48°20'52.4"   | Artesian well    | 18    | São João      |
| P08   | 01°23'23.9"              | 048°20'55.5"  | Artesian well    | 18    | São João      |
| P09   | 01°23'24.2"              | 048°20'58.2"  | Artesian well    | 18    | São João      |
| P10   | 01°23'30.0"              | 048°20'57.6"  | Artesian well    | 18    | São João      |
| P11   | 01°23'17.6"              | 048°20'51.9"  | Artesian well    | 18    | Uriboca       |
| P12   | 01°23'15.8"              | 048°20'50.8"  | Artesian well    | 18    | Uriboca       |
| P13   | 01°23'12.6"              | 048°20'51.1"  | Amazon well      | 18    | Uriboca       |
| P14   | 01°23'12.0"              | 048°20'50.9"  | Artesian well    | 13    | São João      |
| P15   | 01°23'11.8"              | 048°20'48.7"  | Artesian well    | 18    | São João      |
| P16   | 01°23'14.1"              | 048°20'46.7"  | Artesian well    | 18    | Uriboca       |
| P17   | 01°23'16.4"              | 048°20'44.2"  | Artesian well    | 18    | Uriboca       |
| P18   | 01°23'16.3"              | 048°20'46.0"  | Artesian well    | 17    | Uriboca       |
| P19   | 01°23'15.3"              | 048°20'41.7"  | Amazon well      | 17    | Uriboca       |
| P20   | 01°23'14.8"              | 048°20'38.7"  | Amazon well      | 12    | Uriboca       |
| P21   | 01°23'15.1"              | 048°20'33.8"  | Amazon well      | 12    | Uriboca       |
| P22   | 01°23'08.1"              | 048°20'22.4"  | Artesian well    | 14    | Santa Lúcia I |
| P23   | 01°23'11.1"              | 048°20'33.9"  | Artesian well    | 22    | Uriboca       |
| P24   | 01°23'12.5"              | 048°20'55.3"  | Artesian well    | 23    | São João      |
| P25   | 01°23'12.2"              | 048°21'00.0"  | Artesian well    | 24    | São João      |
| P26   | 01°23'10.6"              | 048°21'00.4"  | Artesian well    | 12    | São João      |
| P27   | 01°23'10.3"              | 048°20'59.5"  | Artesian well    | 12    | São João      |
| P28   | 01°23'12.5"              | 048°20'55.2"  | Artesian well    | 18    | São João      |
| P29   | 01°23'12.2"              | 048°20'54.6"  | Artesian well    | 18    | São João      |
| P30   | 01°23'12.2"              | 048°20'52.54" | Artesian well    | 12    | São João      |
| P31   | 01°23'11.7"              | 048°23'11.7"  | Amazon well      | 18    | São João      |
| P32   | 01°23'10.4"              | 048°20'50.4"  | Amazon well      | 6     | São João      |
| P33   | 1°23'10.36"              | 048°20'50.22" | Artesian well    | 16    | São João      |
| P34   | 01°23'18.4"              | 048°20'34.6"  | Artesian well    | 12    | Uriboca       |
| P35   | 01°23'20.2"              | 048°20'33.7"  | Amazon well      | 15    | Uriboca       |
| P36   | 01°23'20.5"              | 048°20'35.2"  | Amazon well      | 10,5  | Uriboca       |
| P37   | 01°23'15.8"              | 048°20'32.8"  | Artesian well    | 9     | Uriboca       |
| P38   | 01°23'15.1"              | 048°20'27.4"  | Artesian well    | 17    | Uriboca       |
| P39   | 01°23'13.4"              | 048°20'25.5"  | Artesian well    | 17    | Uriboca       |
| P40   | 01°23'10.8"              | 048°20'26.5"  | Artesian well    | 17    | Uriboca       |
| P41   | 01°23'09.4"              | 048°20'28.1"  | Artesian well    | 18    | Uriboca       |
| P42   | 01°23'09.5"              | 048°20'33.2"  | Artesian well    | 18    | Uriboca       |
| P43   | 01°23'12.6"              | 048°20'35.3"  | Amazon well      | 13    | Uriboca       |
| P44   | 01°23'06.8"              | 048°20'14.1"  | Artesian well    | 17    | Beira Rio     |
| P45   | 01°23'08.5"              | 048°20'15.3"  | Artesian well    | 18    | Beira Rio     |
| P46   | 01°23'08.7"              | 048°20'18.0"  | Artesian well    | 24    | Beira Rio     |

| Point | Geographical Coordinates |               | Source of Supply | Depth | Neighbourhood |
|-------|--------------------------|---------------|------------------|-------|---------------|
| P47   | 01°23'10.6"              | 048°20'22.1"  | Artesian well    | 18    | Beira Rio     |
| P48   | 01°23'10.3"              | 048°20'22.0"  | Artesian well    | 18    | Beira Rio     |
| P49   | 01°23'09.9"              | 048°20'18.7"  | Artesian well    | 17    | Beira Rio     |
| P50   | 01°23'10.8"              | 048°20'17.7"  | Artesian well    | 17    | Beira Rio     |
| P51   | 01°23'11.5"              | 048°20'16.3"  | Artesian well    | 18    | Beira Rio     |
| P52   | 01°23'12.1"              | 048°20'13.8"  | Artesian well    | 18    | Beira Rio     |
| P53   | 01°23'12.8"              | 048°20'15.1"  | Artesian well    | 17    | Beira Rio     |
| P54   | 01°23'14.3"              | 048°20'18.0"  | Artesian well    | 18    | Beira Rio     |
| P55   | 01°23'15.4"              | 048°20'16.9"  | Artesian well    | 18    | Beira Rio     |
| P56   | 01°23'11.3"              | 048°20'21.1"  | Artesian well    | 18    | Beira Rio     |
| P57   | 01°23'16.8"              | 048°20'15.8"  | Artesian well    | 18    | Beira Rio     |
| P58   | 01°23'15.8"              | 048°20'14.3"  | Artesian well    | 18    | Beira Rio     |
| P59   | 01°23'18.8"              | 048°20'14.3"  | Artesian well    | 24    | Beira Rio     |
| P60   | 01°23'05.4"              | 048°20'12.3"  | Artesian well    | 24    | Beira Rio     |
| P61   | 01°23'05.5"              | 048°20'12.2"  | Amazon well      | 24    | Beira Rio     |
| P62   | 01°23'05.5"              | 048°20'12.2"  | Artesian well    | 18    | Beira Rio     |
| P63   | 01°23'06.7"              | 048°20'17.1"  | Artesian well    | 18    | Beira Rio     |
| P64   | 01°23'05.9"              | 048°20'17.7"  | Amazon well      | 15    | Beira Rio     |
| P65   | 01°23'07.1"              | 048°20'19.6"  | Artesian well    | 18    | Beira Rio     |
| P66   | 01°23'12.6"              | 048°20'18.8"  | Artesian well    | 30    | Beira Rio     |
| P67   | 01°23'14.6"              | 048°20'13.8"  | Artesian well    | 18    | Beira Rio     |
| P68   | 01°23'13.1"              | 048°20'14.4"  | Artesian well    | 24    | Beira Rio     |
| P69   | 01°23'27.3"              | 048°19'55.0"  | Artesian well    | 18    | Santa Lúcia I |
| P70   | 01°23'28.1"              | 048°20'03.8"  | Artesian well    | 40    | Santa Lúcia I |
| P71   | 01°23'28.1"              | 048°20'02.1"  | Artesian well    | 40    | Santa Lúcia I |
| P72   | 01°23'28.2"              | 048°20'04.0"  | Artesian well    | 40    | Santa Lúcia I |
| P73   | 01°23'27.4"              | 048°20'04.0"  | Artesian well    | 40    | Santa Lúcia I |
| P74   | 01°23'27.8"              | 048°20'02.6"  | Artesian well    | 40    | Santa Lúcia I |
| P75   | 01°23'27.7"              | 048°20'02.2"  | Artesian well    | 40    | Santa Lúcia I |
| P76   | 01°23'26.9"              | 048°20'00.7"  | Artesian well    | 40    | Santa Lúcia I |
| P77   | 01°23'28.1"              | 048°19'58.0"  | Artesian well    | 18    | Santa Lúcia I |
| P78   | 01°23'27.3"              | 048°19'57.7"  | Artesian well    | 30    | Santa Lúcia I |
| P79   | 01°23'26.3"              | 048°19'56.7"  | Artesian well    | 40    | Santa Lúcia I |
| P80   | 01°23'24.9"              | 048°19'52.4"  | Artesian well    | 40    | Santa Lúcia I |
| P81   | 01°23'24.1"              | 048°19'56.0"  | Artesian well    | 40    | Santa Lúcia I |
| P82   | 01°23'24.3"              | 048°19'57.7"  | Artesian well    | 40    | Santa Lúcia I |
| P83   | 01°23'23.3"              | 048°20'00.4"  | Artesian well    | 40    | Santa Lúcia I |
| P84   | 01°23'25.3"              | 048°20'02.0"  | Artesian well    | 40    | Santa Lúcia I |
| P85   | 01°23'26.58"             | 048°20'4.91"  | Artesian well    | 18    | Santa Lúcia I |
| P86   | 01°23'24.21"             | 048°19'55.00" | Artesian well    | 40    | Santa Lúcia I |
| P87   | 01°23'27.01"             | 048°19'56.68" | Artesian well    | 40    | Santa Lúcia I |
| P88   | 01°23'26.36"             | 048°19'55.01" | Artesian well    | 40    | Santa Lúcia I |
| P89   | 01°23'14.2"              | 048°18'54.0"  | Artesian well    | 40    | Decouville    |
| P90   | 01°23'14.5"              | 048°18'55.1"  | Artesian well    | 266   | Decouville    |
| P91   | 01°23'12.7"              | 048°18'54.6"  | Artesian well    | 266   | Decouville    |
| P92   | 01°23'12.7"              | 048°18'54.1"  | Artesian well    | 266   | Decouville    |
| P93   | 01°23'11.9"              | 048°18'53.9"  | Artesian well    | 266   | Decouville    |
| P94   | 01°23'10.9"              | 048°18'52.6"  | Artesian well    | 266   | Decouville    |

| Point | Geographical Coordinates |               | Source of Supply | Depth | Neighbourhood |
|-------|--------------------------|---------------|------------------|-------|---------------|
| P95   | 01°23'09.6"              | 048°18'53.3"  | Artesian well    | 266   | Decouville    |
| P96   | 01°23'10.1"              | 048°18'53.4"  | Artesian well    | 266   | Decouville    |
| P97   | 01°23'10.2"              | 048°18'53.9"  | Artesian well    | 266   | Decouville    |
| P98   | 01°23'11.01"             | 048°18'55.35" | Artesian well    | 266   | Decouville    |
| P99   | 01°23'10.3"              | 048°18'56.6"  | Artesian well    | 266   | Decouville    |
| P100  | 01°23'10.0"              | 048°18'55.3"  | Artesian well    | 266   | Decouville    |
| P101  | 01°23'09.6"              | 048°18'56.1"  | Artesian well    | 266   | Decouville    |
| P102  | 01°23'7.27"              | 048°18'55.08" | Artesian well    | 266   | Decouville    |
| P103  | 01°23'08.6"              | 048°18'56.3"  | Artesian well    | 266   | Decouville    |
| P104  | 01°23'7.77"              | 048°18'55.02" | Artesian well    | 266   | Decouville    |
| P105  | 01°23'07.8"              | 048°18'58.5"  | Artesian well    | 266   | Decouville    |
| P106  | 01°23'05.7"              | 048°18'55.8"  | Artesian well    | 266   | Decouville    |
| P107  | 01°23'7.30"              | 048°18'59.24" | Artesian well    | 266   | Decouville    |
| P108  | 01°23'06.7"              | 048°18'58.3"  | Artesian well    | 266   | Decouville    |
| P109  | 01°23'05.8"              | 048°19'00.6"  | Artesian well    | 266   | Decouville    |
| P110  | 01°23'04.8"              | 048°18'58.0"  | Artesian well    | 266   | Decouville    |
| P111  | 01°23'04.7"              | 048°18'58.0"  | Artesian well    | 266   | Decouville    |
| P112  | 01°23'02.4"              | 048°18'58.6"  | Artesian well    | 266   | Decouville    |
| P113  | 01°23'02.9"              | 048°18'58.2"  | Artesian well    | 266   | Decouville    |
| P114  | 01°23'4.69"              | 048°19'0.71"  | Artesian well    | 266   | Decouville    |
| P115  | 01°23'04.7"              | 048°19'00.1"  | Artesian well    | 266   | Decouville    |
| P116  | 01°23'03.3"              | 048°19'01.8"  | Artesian well    | 266   | Decouville    |
| P117  | 01°22'59.41"             | 048°19'3.28"  | Artesian well    | 266   | Decouville    |
| P118  | 01°22'55.9"              | 048°19'03.7"  | Artesian well    | 266   | Decouville    |
| P119  | 01°22'56.8"              | 048°19'04.5"  | Artesian well    | 266   | Decouville    |
| P120  | 01°22'56.9"              | 048°19'04.1"  | Artesian well    | 266   | Decouville    |
| P121  | 01°22'57.3"              | 048°19'05.2"  | Artesian well    | 266   | Decouville    |
| P122  | 01°22'56.9"              | 048°19'06.0"  | Artesian well    | 266   | Decouville    |
| P123  | 01°22'58.2"              | 048°19'05.3"  | Artesian well    | 266   | Decouville    |
| P124  | 01°22'58.01"             | 048°19'6.63"  | Artesian well    | 266   | Decouville    |
| P125  | 01°22'54.8"              | 048°19'04.1"  | Artesian well    | 266   | Decouville    |
| P126  | 01°22'55.8"              | 048°19'04.8"  | Artesian well    | 266   | Decouville    |
| P127  | 01°23'11.34"             | 048°18'49.18" | Artesian well    | 266   | Decouville    |
| P128  | 01°23'10.5"              | 048°18'48.3"  | Artesian well    | 266   | Decouville    |
| P129  | 01°23'09.0"              | 048°18'46.7"  | Artesian well    | 266   | Decouville    |
| P130  | 01°23'07.0"              | 048°18'43.6"  | Artesian well    | 24    | São Pedro     |
| P131  | 01°23'06.8"              | 048°18'45.3"  | Artesian well    | 266   | Decouville    |
| P132  | 01°23'05.0"              | 048°18'43.6"  | Artesian well    | 30    | São Pedro     |
| P133  | 01°23'06.7"              | 048°18'44.4"  | Amazon well      | 10    | São Pedro     |
| P134  | 01°23'06.8"              | 048°18'49.2"  | Artesian well    | 266   | Decouville    |
| P135  | 01°23'03.4"              | 048°18'52.0"  | Artesian well    | 266   | Decouville    |
| P136  | 01°23'03.0"              | 048°18'50.3"  | Artesian well    | 266   | Decouville    |
| P137  | 01°22'57.7"              | 048°18'54.8"  | Artesian well    | 266   | Decouville    |
| P138  | 01°23'16.23"             | 048°18'44.80" | Artesian well    | 266   | Decouville    |
| P139  | 01°23'14.6"              | 048°18'42.4"  | Artesian well    | 266   | Decouville    |
| P140  | 01°23'13.5"              | 048°18'42.8"  | Artesian well    | 266   | Decouville    |
| P141  | 01°23'13.26"             | 48°18'42.12"  | Artesian well    | 266   | Decouville    |
| P142  | 01°23'14.1"              | 048°18'46.2"  | Artesian well    | 266   | Decouville    |

| Point | Geographical Coordinates |               | Source of Supply | Depth | Neighbourhood |
|-------|--------------------------|---------------|------------------|-------|---------------|
| P143  | 01°23'13.3"              | 048°18'44.3"  | Artesian well    | 266   | Decouville    |
| P144  | 01°23'12.2"              | 048°18'43.0"  | Artesian well    | 266   | Decouville    |
| P145  | 01°23'11.3"              | 048°18'44.9"  | Artesian well    | 266   | Decouville    |
| P146  | 01°23'12.5"              | 048°18'46.1"  | Artesian well    | 266   | Decouville    |
| P147  | 01°23'11.6"              | 048°18'47.2"  | Artesian well    | 266   | Decouville    |
| P148  | 01°23'10.2"              | 048°18'45.1"  | Artesian well    | 266   | Decouville    |
| P149  | 01°23'08.1"              | 048°18'47.2"  | Artesian well    | 266   | Decouville    |
| P150  | 01°23'04.5"              | 048°18'51.0"  | Artesian well    | 266   | Decouville    |
| P151  | 01°23'02.5"              | 048°18'55.0"  | Artesian well    | 266   | Decouville    |
| P152  | 01°22'56.06"             | 048°18'57.13" | Artesian well    | 266   | Decouville    |
| P153  | 01°22'54.0"              | 048°18'59.4"  | Artesian well    | 266   | Decouville    |
| P154  | 01°22'52.81"             | 048°18'58.32" | Artesian well    | 266   | Decouville    |
| P155  | 01°22'50.4"              | 048°18'57.7"  | Artesian well    | 266   | Decouville    |
| P156  | 01°22'52.1"              | 048°19'00.3"  | Artesian well    | 266   | Decouville    |
| P157  | 01°22'52.0"              | 048°19'01.9"  | Artesian well    | 266   | Decouville    |
| P158  | 01°22'51.1"              | 048°19'01.0"  | Artesian well    | 266   | Decouville    |
| P159  | 01°22'49.9"              | 048°19'00.5"  | Artesian well    | 266   | Decouville    |
| P160  | 01°22'49.5"              | 048°18'59.7"  | Artesian well    | 266   | Decouville    |
| P161  | 01°22'50.0"              | 048°19'03.6"  | Artesian well    | 266   | Decouville    |
| P162  | 01°22'46.8"              | 048°19'02.6"  | Artesian well    | 266   | Decouville    |
| P163  | 01°22'48.0"              | 048°19'04.0"  | Artesian well    | 266   | Decouville    |
| P164  | 01°22'47.3"              | 048°19'05.6"  | Artesian well    | 266   | Decouville    |
| P165  | 01°22'46.5"              | 048°19'03.6"  | Artesian well    | 266   | Decouville    |
| P166  | 01°23'10.2"              | 048°18'40.4"  | Artesian well    | 10    | Decouville    |
| P167  | 01°23'28.8"              | 048°18'22.9"  | Artesian well    | 20    | São Pedro     |
| P168  | 01°23'28.3"              | 048°18'23.3"  | Amazon well      | 6     | São Pedro     |
| P169  | 01°23'27.1"              | 048°18'24.2"  | Artesian well    | 20    | São Pedro     |
| P170  | 01°23'26.6"              | 048°18'25.3"  | Amazon well      | 12    | São Pedro     |
| P171  | 01°23'22.9"              | 048°18'27.0"  | Amazon well      | 6     | São Pedro     |
| P172  | 01°23'14.7"              | 048°18'32.9"  | Amazon well      | 6     | São Pedro     |
| P173  | 01°23'12.6"              | 048°18'35.2"  | Amazon well      | 18    | São Pedro     |
| P174  | 01°23'10.2"              | 048°18'36.8"  | Artesian well    | 266   | São Pedro     |
| P175  | 01°23'03.3"              | 048°18'41.1"  | Artesian well    | 18    | São Pedro     |
| P176  | 01°23'1.35"              | 048°18'43.74" | Artesian well    | 12    | São Pedro     |
| P177  | 01°23'01.0"              | 048°18'45.0"  | Amazon well      | 12    | São Pedro     |
| P178  | 01°22'59.4"              | 048°18'45.8"  | Amazon well      | 12    | São Pedro     |
| P179  | 01°22'56.9"              | 048°18'48.0"  | Artesian well    | 24    | São Pedro     |
| P180  | 01°22'53.6"              | 048°18'49.8"  | Amazon well      | 12    | São Pedro     |
| P181  | 01°22'48.8"              | 048°18'52.3"  | Amazon well      | 13    | São Pedro     |
| P182  | 01°22'42.3"              | 048°18'58.0"  | Artesian well    | 266   | São Pedro     |
| P183  | 01°22'45.1"              | 048°18'58.0"  | Artesian well    | 266   | São Pedro     |
| P184  | 01°22'49.4"              | 048°18'55.4"  | Artesian well    | 266   | São Pedro     |
| P185  | 01°22'48.3"              | 048°18'54.3"  | Artesian well    | 266   | São Pedro     |

**Note:** 185 water samples were collected, however, P07 refers to an igarapé (surface water), and for this reason was excluded from this study. Totaling 184 samples of underground water from artesian and Amazon type wells.

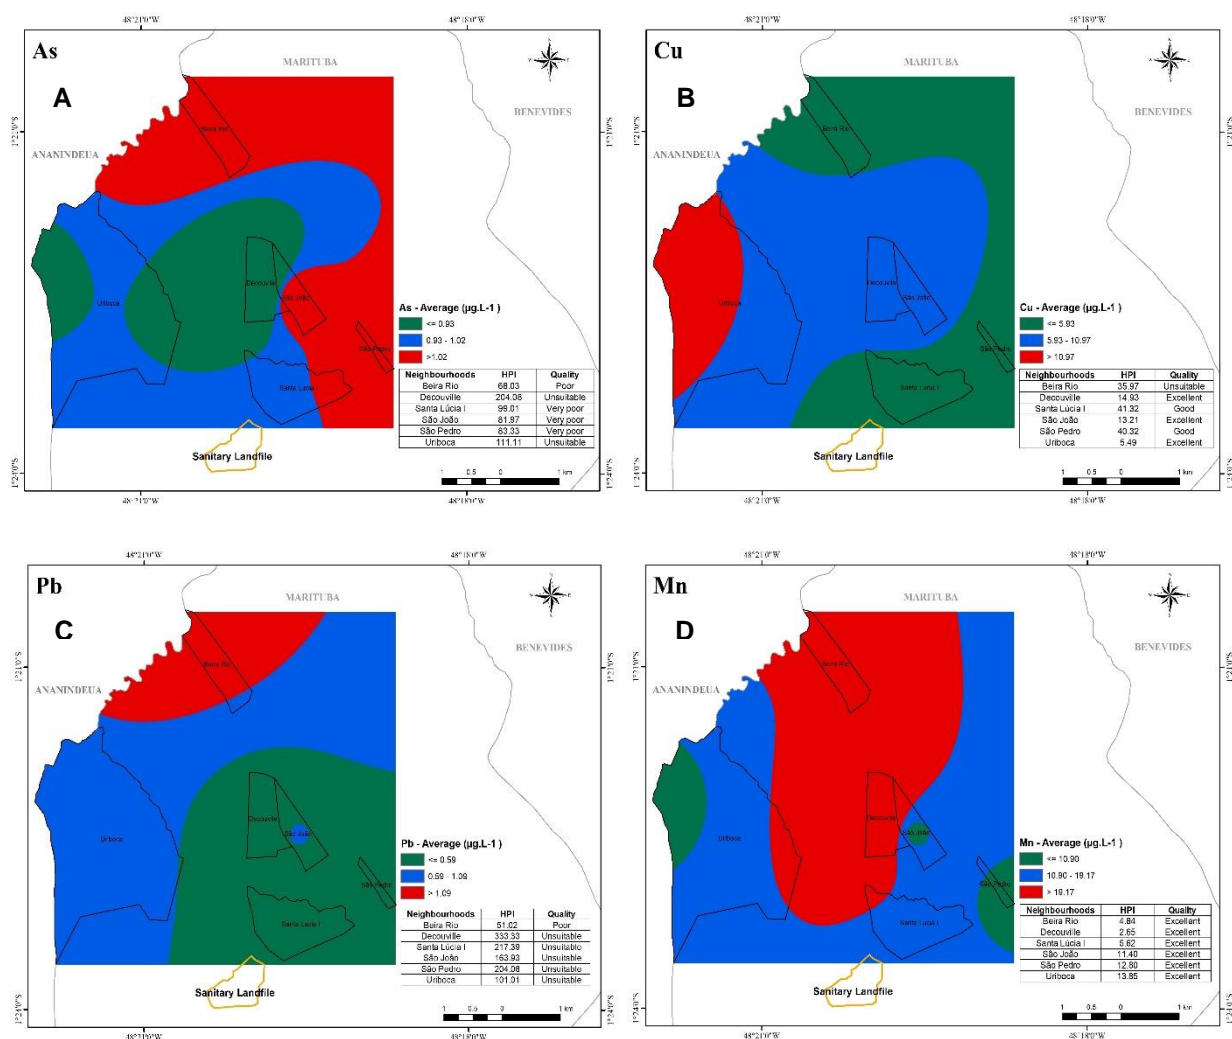

**Figure S1.** Spatial distribution of mean concentrations for As, Cu, Pb, and Mn and HPI classification in the neighbourhoods surrounding the landfill, Amazonia, Brazil.
